# Supplementary material for: Live Attenuated Listeria Monocytogenes Effectively Treats Hepatic Colorectal Cancer Metastases and Is Strongly Enhanced by Depletion of Regulatory T Cells
Source: Oxford University Press journal article supplement (doi:10.1158/0008-5472.can-07-0573), 2007-10-15
Supplement: 00085472can070573-sup-supp_fig_legends_1-3.pdf [file 00085472can070573-sup-supp_fig_legends_1-3.pdf]

**Supplemental Figure 1:** Kinetics of the percentage for CD4+/Foxp3+ T cells in the liver.

Mice bearing hepatic metastases of CT26 were left untreated (NT), treated with LM-D, Cy, or both as in Figure 4. Livers from each group were harvested at 3 time points, 9, 14, and 21 days after tumor challenge and processed for flow cytometry analysis. The percentages/liver were checked at different time points for CD4+/Foxp3+ T cells.

**Supplemental Figure 2:** Kinetics of the percentage for CD4+/Foxp3+ T cells in the spleen.

Mice bearing hepatic metastases of CT26 were left untreated (NT), treated with LM-D, Cy, or both as in Figure 4. Spleens from each group were harvested at 3 time points, 9, 14, and 21 days after tumor challenge and processed for flow cytometry analysis. The percentages/spleen were checked at different time points for CD4+/Foxp3+ T cells.

**Supplemental Figure 3:** Kinetics of CD4+, CD8+, and CD4/Foxp3+ cells from spleen populations in mice bearing hepatic metastases.

Mice bearing hepatic metastases of CT26 were left untreated (NT), treated with LM-D, Cy, or both as in Figure 4. Spleens from each group were harvested at 3 time points, 9, 14, and 21 days after tumor challenge and processed for flow cytometry analysis. Total cells/spleen were enumerated at different time points for CD4+ T cells (A), CD8+ T cells (B), and CD4+/Foxp3+ T cells (C).
